# Supplementary material for: Incidence of fractures in people with intellectual disabilities over the life course: a retrospective matched cohort study
Source: PubMed Central journal article supplement — eClinicalMedicine. 2022 Sep 30;52:101656. doi: 10.1016/j.eclinm.2022.101656 (PMC9596306; doi:10.1016/j.eclinm.2022.101656), 2022-09-30
Supplement: mmc1.pdf [file mmc1.pdf]

## Supplementary material

### Table of contents

Table 1. Codes/terms used to identify individuals with Intellectual Disability in CPRD GOLD database. Pages 2-6.

Table 2. Codes/terms used to characterise individuals in the CPRD GOLD database identified only by a general Intellectual Disability Read term/code. Pages 7-19

Table 3. Incidence of any fracture in males and females with and without Intellectual Disabilities (ID) by age bands. Page 20-22.

Table 4. Incidence of major osteoporotic fracture in males and females with and without Intellectual Disabilities (ID) by age bands. Page 23-24

Table 5. Incidence of hip fracture in males and females with and without Intellectual Disabilities (ID) by age bands. Page 25-26.

**Table 1. Codes/terms used to identify individuals with Intellectual Disability in CPRD GOLD database****Legend**

- 1) Medcode: unique code found in CPRD GOLD database, corresponding to the Read code/term used for coding in UK General Practice
- 2) Read term and Read code: these are used for classification of medical conditions, procedures, service user events in UK general practice. NB One condition can be described by more than one Read code/term
- 3) Rows 1-103: general codes (i.e. codes directly indicating an intellectual disability but without a specified cause) and service user codes (codes indirectly indicating an intellectual disability)
- 4) Rows 104-217: codes indicating a specific medical condition which in the majority of cases is associated with an intellectual disability
- 5) Rows 32, 41, 59: learning difficulties codes. Individuals with these codes were excluded if in their record a code indicating a specific learning difficulty was also found (e.g. dyslexia, dyscalculia) as these individuals would be unlikely to have a global intellectual impairment.
- 6) Individuals with intellectual disabilities were identified by the presence in their records of any of the Read codes/terms in this list. However, individual records may have contained several such codes.

| Row | Medcode | Read code | Read term                                                    |
|-----|---------|-----------|--------------------------------------------------------------|
| 1   | 1787    | E30..00   | Mild mental retardation, IQ in range 50-70                   |
| 2   | 28740   | Eu70.00   | [X]Mild mental retardation                                   |
| 3   | 33949   | Eu70.12   | [X]Mild mental subnormality                                  |
| 4   | 39016   | Eu70y00   | [X]Mild mental retardation, other impairments of behaviour   |
| 5   | 50606   | Eu70z00   | [X]Mild mental retardation without mention impairment behav  |
| 6   | 99774   | Eu81600   | [X]Mild learning disability                                  |
| 7   | 39412   | Eu70100   | [X]Mld mental retard sig impairment behav req attent/treatmt |
| 8   | 46504   | Eu70000   | [X]Mld mental retard with statement no or min impairm behav  |
| 9   | 302     | E310.00   | Moderate mental retardation, IQ in range 35-49               |
| 10  | 34734   | Eu71.11   | [X]Moderate mental subnormality                              |
| 11  | 54881   | Eu71100   | [X]Mod mental retard sig impairment behav req attent/treatmt |
| 12  | 59407   | Eu71y00   | [X]Mod retard oth behav impair                               |
| 13  | 60473   | Eu71z00   | [X]Mod mental retardation without mention impairment behav   |
| 14  | 60913   | Eu71000   | [X]Mod mental retard with statement no or min impairm behav  |
| 15  | 6123    | Eu71.00   | [X]Moderate mental retardation                               |
| 16  | 98342   | Eu81400   | [X]Moderate learning disability                              |
| 17  | 27691   | Eu72.11   | [X]Severe mental subnormality                                |
| 18  | 36143   | Eu72.00   | [X]Severe mental retardation                                 |
| 19  | 4825    | E311.00   | Severe mental retardation, IQ in range 20-34                 |
| 20  | 50751   | Eu72100   | [X]Sev mental retard sig impairment behav req attent/treatmt |
| 21  | 50947   | Eu72000   | [X]Sev mental retard with statement no or min impairm behav  |
| 22  | 55560   | Eu72z00   | [X]Sev mental retardation without mention impairment behav   |
| 23  | 55848   | Eu72y00   | [X]Severe mental retardation, other impairments of behaviour |
| 24  | 98293   | Eu81500   | [X]Severe learning disability                                |
| 25  | 100648  | Eu81700   | [X]Profound learning disability                              |
| 26  | 45133   | E312.00   | Profound mental retardation with IQ less than 20             |
| 27  | 51268   | Eu73.00   | [X]Profound mental retardation                               |
| 28  | 60062   | Eu73z00   | [X]Prfnd mental retardation without mention impairment behav |
| 29  | 65468   | Eu73.11   | [X]Profound mental subnormality                              |
| 30  | 90276   | Eu73y00   | [X]Profound mental retardation, other impairments of behav   |
| 31  | 98100   | Eu73100   | [X]Profound ment retard sig impairmnt behav req attent/treat |
| 32  | 106116  | Z7CD211   | LD - Learning difficulties                                   |

|    |        |         |                                                              |
|----|--------|---------|--------------------------------------------------------------|
| 33 | 107968 | Eu81800 | [X]Specific learning disability                              |
| 34 | 110427 | 13VC900 | Intellectual development disorder of unknown aetiology       |
| 35 | 11866  | Z7CBE00 | Intellectual functioning disability                          |
| 36 | 1278   | E310.11 | Imbecile                                                     |
| 37 | 1362   | E3...00 | Mental retardation                                           |
| 38 | 1680   | E30..11 | Educationally subnormal                                      |
| 39 | 16855  | Eu81z12 | [X]Learning disorder NOS                                     |
| 40 | 19436  | ZS34.11 | Learning disability                                          |
| 41 | 2052   | 13Z4E00 | Learning difficulties                                        |
| 42 | 28962  | Eu7..00 | [X]Mental retardation                                        |
| 43 | 30362  | R034y11 | [D]Global retardation                                        |
| 44 | 32820  | Eu7zz00 | [X]Unsp mental retardation without mention impairment behav  |
| 45 | 34174  | Eu84112 | [X]Mental retardation with autistic features                 |
| 46 | 36045  | Eu81z13 | [X]Learn acquisition disab NOS                               |
| 47 | 37867  | E3z..00 | Mental retardation NOS                                       |
| 48 | 37887  | Eu7z.11 | [X]Mental deficiency NOS                                     |
| 49 | 37911  | Eu7z.12 | [X]Mental subnormality NOS                                   |
| 50 | 4246   | 6664    | Mental handicap problem                                      |
| 51 | 42520  | Eu7yy00 | [X]Other mental retardation, other impairments of behaviour  |
| 52 | 42589  | Eu7z.00 | [X]Unspecified mental retardation                            |
| 53 | 42886  | Eu7z000 | [X]Unsp mental retard with statement no or min impair behav  |
| 54 | 4477   | Eu81z11 | [X]Learning disability NOS                                   |
| 55 | 51622  | E312.11 | Idiocy                                                       |
| 56 | 51954  | E30..12 | Feeble-minded                                                |
| 57 | 52602  | Eu84400 | [X]Overactive disorder assoc mental retard/stereotype movts  |
| 58 | 54179  | E31z.00 | Other specified mental retardation NOS                       |
| 59 | 56376  | Z7CD200 | Learning difficulties                                        |
| 60 | 56547  | Eu7y100 | [X]Oth mental retard sig impairment behav req attent/treatmt |
| 61 | 56577  | E31..00 | Other specified mental retardation                           |
| 62 | 57199  | E3y..00 | Other specified mental retardation                           |
| 63 | 63273  | Eu7yz00 | [X]Other mental retardation without mention impairment behav |
| 64 | 66383  | Eu7zy00 | [X]Unspecified mental retardatn, other impairments of behav  |
| 65 | 66783  | Eu7z100 | [X]Unsp mentl retard sig impairment behav req attent/treatmt |
| 66 | 70008  | Eu7y000 | [X]Oth mental retard with statement no or min impair behav   |
| 67 | 71196  | Eu7y.00 | [X]Other mental retardation                                  |
| 68 | 71632  | E30..13 | Moron                                                        |
| 69 | 84154  | Eu70.11 | [X]Feeble-mindedness                                         |
| 70 | 97406  | ZLD2f00 | Discharge by psychiatrist for mental handicap                |
| 71 | 100729 | 9HB7.00 | Did not attend learning disabilities annual health assessmnt |
| 72 | 100730 | 9HB6.00 | Learning disabilities annual health assessment declined      |
| 73 | 100965 | 9HB6.11 | Learning disabilities annual health check declined           |
| 74 | 100980 | 9hL..00 | Exception reporting: learning disability quality indicators  |
| 75 | 102234 | 9HB7.11 | Did not attend learning disabilities annual health check     |
| 76 | 103187 | 8Ce6.00 | Preferred place of care - learning disability unit           |
| 77 | 106219 | 9mA..00 | Learning disability annual health check invitation           |
| 78 | 106247 | 9mA2.00 | Learning disability annual health check letter invitation    |
| 79 | 106248 | 9mA1.00 | Learning disability annual health check telephone invitation |

|     |        |         |                                                               |
|-----|--------|---------|---------------------------------------------------------------|
| 80  | 106249 | 9mA0.00 | Learning disability annual health check verbal invitation     |
| 81  | 106272 | 9mA2000 | Learning disability annual health check invitation 1st letter |
| 82  | 106274 | 9mA2100 | Learning disability annual health check invitation 2nd letter |
| 83  | 106276 | 9mA2200 | Learning disability annual health check invitation 3rd letter |
| 84  | 110002 | 9Nh.00  | Seen by learning disability team                              |
| 85  | 110792 | 9Nh4.00 | Under care of community learning disability team              |
| 86  | 18815  | 8HHP.00 | Referral to learning disability team                          |
| 87  | 19445  | 9HB..00 | Learning disabilities administration status                   |
| 88  | 22760  | 918e.00 | On learning disability register                               |
| 89  | 32511  | 9HB3.00 | Learning disabilities health assessment                       |
| 90  | 32588  | ZL1B500 | Under care of psychiatrist for mental handicap                |
| 91  | 32667  | 8Hg2.00 | Discharge from learning disability team                       |
| 92  | 32924  | ZLE9400 | Discharge from mental handicap psychiatry service             |
| 93  | 32952  | 9HB5.00 | Learning disabilities annual health assessment                |
| 94  | 38954  | ZL9D500 | Seen by psychiatrist for mental handicap                      |
| 95  | 40894  | ZL5B500 | Referral to psychiatrist for mental handicap                  |
| 96  | 41391  | 9HB1.00 | Learning disabilities health action plan offered              |
| 97  | 43436  | 9HB4.00 | Learning disabilities health action plan completed            |
| 98  | 43445  | 9HB2.00 | Learning disabilities health action plan reviewed             |
| 99  | 43447  | 9HB0.00 | Learning disabilities health action plan declined             |
| 100 | 66203  | ZR3c.11 | CASP - Communic assess profile adults with mental handicap    |
| 101 | 93406  | 9N0y.00 | Seen in learning disabilities clinic                          |
| 102 | 94684  | 8H4f.00 | Referral to learning disabilities psychiatrist                |
| 103 | 96895  | 69DB.00 | Learning disability health examination                        |
| 104 | 101309 | PJ02.11 | Partial trisomy 21 in Down's syndrome                         |
| 105 | 10759  | PJ0z.00 | Down's syndrome NOS                                           |
| 106 | 1543   | PJ0..00 | Down's syndrome - trisomy 21                                  |
| 107 | 18415  | PJ0..12 | Trisomy 21                                                    |
| 108 | 23489  | PJ0..11 | Mongolism                                                     |
| 109 | 32010  | PJ01.00 | Trisomy 21, mosaicism                                         |
| 110 | 42701  | PJ00.00 | Trisomy 21, meiotic nondisjunction                            |
| 111 | 61499  | PJ02.00 | Trisomy 21, translocation                                     |
| 112 | 61627  | PJ0z.11 | Trisomy 21 NOS                                                |
| 113 | 100024 | PJ50800 | Trisomy 22                                                    |
| 114 | 100174 | PJ51z00 | Partial trisomy syndrome NOS                                  |
| 115 | 101732 | PJ50y00 | Other specified whole chromosome trisomy syndrome             |
| 116 | 37702  | PJ50.00 | Whole chromosome trisomy syndromes                            |
| 117 | 45512  | PJ50x00 | Whole chromosome trisomy, mosaicism                           |
| 118 | 71815  | PJ51000 | Major partial trisomy                                         |
| 119 | 100507 | PJ33400 | Jacobsen syndrome                                             |
| 120 | 102102 | PJ12.11 | Partial trisomy 13 in Patau's syndrome                        |
| 121 | 35665  | PJ1..00 | Patau's syndrome - trisomy 13                                 |
| 122 | 72265  | PJ1z.00 | Patau's syndrome NOS                                          |
| 123 | 19038  | PJ1z.11 | Trisomy 13 NOS                                                |
| 124 | 43565  | PJ11.00 | Trisomy 13, mosaicism                                         |
| 125 | 46133  | PJ12.00 | Trisomy 13, translocation                                     |
| 126 | 72139  | PJ10.00 | Trisomy 13, meiotic nondisjunction                            |

|     |        |          |                                                |
|-----|--------|----------|------------------------------------------------|
| 127 | 103139 | C375400  | Mucopolysaccharidosis, type IV                 |
| 128 | 104999 | C375z00  | Mucopolysaccharidosis NOS                      |
| 129 | 22851  | C375.00  | Mucopolysaccharidosis                          |
| 130 | 35585  | 46T3.00  | Urine mucopolysaccharides                      |
| 131 | 61650  | C375200  | Mucopolysaccharidosis, type II                 |
| 132 | 62762  | C375600  | Mucopolysaccharidosis, type VI                 |
| 133 | 67762  | F103100  | Cerebral degeneration in mucopolysaccharidoses |
| 134 | 69381  | C375100  | Mucopolysaccharidosis, type I                  |
| 135 | 70439  | C375300  | Mucopolysaccharidosis, type III                |
| 136 | 103536 | PJ51500  | 15q partial trisomy syndrome                   |
| 137 | 103582 | PJ33600  | Chromosome 22q11 deletion syndrome             |
| 138 | 10955  | C391100  | Di George syndrome                             |
| 139 | 12840  | PJ3y011  | Velocardiofacial syndrome                      |
| 140 | 103873 | PJ20.00  | Trisomy 18, meiotic nondisjunction             |
| 141 | 107162 | PJ22.11  | Partial trisomy 18 in Edward's syndrome        |
| 142 | 33642  | PJ2..00  | Edward's syndrome - trisomy 18                 |
| 143 | 39017  | PJ2z.00  | Edward's syndrome NOS                          |
| 144 | 46787  | PJ2z.11  | TRISOMY 18 NOS                                 |
| 145 | 67234  | PJ21.00  | Trisomy 18, mosaicism                          |
| 146 | 104100 | PKy7311  | Rubinstein-Taybi syndrome                      |
| 147 | 43325  | PKy7300  | Rubenstein - Tayi syndrome                     |
| 148 | 104196 | PJ33800  | Chromosome 4q deletion syndrome                |
| 149 | 105514 | PJ33A00  | Kleefstra syndrome                             |
| 150 | 106114 | PJ51400  | Trisomy 9p syndrome                            |
| 151 | 109223 | PJ50311  | Trisomy 9 Mosaic Syndrome                      |
| 152 | 65509  | PJ50300  | Trisomy 9                                      |
| 153 | 10628  | PJyy200  | Fragile X chromosome                           |
| 154 | 32603  | PJyy400  | Fragile X syndrome                             |
| 155 | 106590 | PKy5K00  | Cohen syndrome                                 |
| 156 | 106717 | PKyM.00  | Johanson-Blizzard syndrome                     |
| 157 | 107029 | PJ51200  | 10q partial trisomy syndrome                   |
| 158 | 110833 | PJ50400  | Trisomy 10                                     |
| 159 | 108375 | PG5F.00  | Acrodysostosis                                 |
| 160 | 111120 | PJ33113  | 18q deletion syndrome                          |
| 161 | 95440  | PJ33100  | Deletion of long arm of chromosome 18          |
| 162 | 12841  | PJ3y000  | Shprintzen syndrome                            |
| 163 | 1391   | C327100  | Gaucher's disease                              |
| 164 | 16087  | PKy4.000 | William syndrome                               |
| 165 | 21169  | F101300  | Tay-Sach's disease                             |
| 166 | 73990  | F101.11  | Amaurotic familial idiocy                      |
| 167 | 21418  | PKy6011  | Cornelia de Lange syndrome                     |
| 168 | 50457  | PKy6000  | Amsterdam dwarf                                |
| 169 | 25306  | PKyz511  | Angelman syndrome                              |
| 170 | 97059  | PKyz700  | Angelman's syndrome                            |
| 171 | 98617  | PKyz711  | Angelman syndrome                              |
| 172 | 46766  | PKyz500  | Happy puppet syndrome                          |
| 173 | 27280  | PKy0.12  | Prader-Willi syndrome                          |

|     |        |         |                                               |
|-----|--------|---------|-----------------------------------------------|
| 174 | 41461  | PKy0.11 | Prader-Willi Syndrome                         |
| 175 | 28663  | PKy9200 | Menke's syndrome                              |
| 176 | 69127  | PKy9211 | Kinky hair syndrome                           |
| 177 | 31042  | Eu84200 | [X]Rett's syndrome                            |
| 178 | 31426  | PKy1.00 | Laurence-Moon-Biedl syndrome                  |
| 179 | 101999 | Eu84311 | [X]Dementia infantalis                        |
| 180 | 31599  | E141.11 | Heller's syndrome                             |
| 181 | 46429  | Eu84313 | [X]Heller's syndrome                          |
| 182 | 62222  | Eu84312 | [X]Disintegrative psychosis                   |
| 183 | 56143  | E141.00 | Disintegrative psychosis                      |
| 184 | 68299  | Eu84300 | [X]Other childhood disintegrative disorder    |
| 185 | 31795  | PJ31.00 | Cri-du-chat syndrome                          |
| 186 | 98941  | PJ31.11 | Deletion of short arm of chromosome 5         |
| 187 | 33522  | PKy6300 | Smith - Lemli - Opitz syndrome                |
| 188 | 33948  | PJ32.11 | Wolff - Hirschorn syndrome                    |
| 189 | 66566  | PJ32.00 | Deletion of short arm of chromosome 4         |
| 190 | 34719  | PKy6400 | Seckel syndrome                               |
| 191 | 34792  | F250500 | Lennox-Gastaut syndrome                       |
| 192 | 36314  | C1zy211 | Sotos syndrome                                |
| 193 | 44476  | C1zy200 | Cerebral gigantism                            |
| 194 | 36871  | PJ33300 | Smith-Magenis syndrome                        |
| 195 | 37402  | PF55.11 | Apert's syndrome                              |
| 196 | 41840  | PF55000 | Acrocephalosyndactyly (Apert)                 |
| 197 | 63274  | PF55.00 | Acrocephalosyndactyly                         |
| 198 | 50251  | PF55100 | Acrocephalosyndactyly (Pfeiffer)              |
| 199 | 37591  | PJ50100 | Trisomy 7                                     |
| 200 | 37924  | PKy5F00 | Coffin-Lowry syndrome                         |
| 201 | 46516  | C327200 | Niemann-Pick disease                          |
| 202 | 65343  | F102100 | Cerebral degeneration in Niemann-Pick disease |
| 203 | 4749   | PK61.00 | Sturge-Weber syndrome                         |
| 204 | 47974  | F130600 | Aicardi Goutieres syndrome                    |
| 205 | 48084  | PKy9400 | Zellweger's syndrome                          |
| 206 | 57043  | PKy6600 | Dubowitz syndrome                             |
| 207 | 57806  | PJ30.11 | Deletion of long arm of chromosome 21         |
| 208 | 67298  | PJ33000 | Deletion of long arm of chromosome 13         |
| 209 | 67927  | C372300 | Lesch-Nyhan syndrome                          |
| 210 | 69476  | PJ50200 | Trisomy 8                                     |
| 211 | 70198  | PJ50600 | Trisomy 12                                    |
| 212 | 93694  | PJ9..00 | Mowat-Wilson syndrome                         |
| 213 | 93963  | F101600 | Sandhoff disease                              |
| 214 | 97927  | PJ33200 | Deletion of short arm of chromosome 18        |
| 215 | 98753  | P228300 | Aicardi syndrome                              |
| 216 | 33939  | P21z.00 | Microcephalus NOS                             |
| 217 | 5712   | P21..00 | Microcephalus                                 |

**Table 2. Codes/terms used to characterise individuals in the CPRD GOLD database identified only by a general Intellectual Disability Read term/code**

**Legend**

1) Medcode: unique code found in CPRD GOLD database, corresponding to the Read code/term used for coding in UK General Practice

2) Read term and Read code: these are used for classification of medical conditions, procedures, service user events in UK general practice. NB One condition can be described by more than one Read code/term

3) Type of condition. 1: congenital and hereditary syndromes; 2: perinatal complications; 3: congenital malformations and other abnormalities; 4: central nervous system infections; 5: cerebral palsy; 6: autism and Attention Deficit Disorder; 7: acquired post-natal brain lesions

**NB** Codes from each of the above categories were found in the study ID population but not every code in each category was found.

| Medcode | Read code | Read term                                                 | Type of condition |
|---------|-----------|-----------------------------------------------------------|-------------------|
| 65121   | PHz..11   | Congenital ectodermal defect                              | 1                 |
| 11513   | PH30.00   | Congenital ectodermal dysplasia                           | 1                 |
| 100627  | F23y511   | Congenital suprabulbar paresis                            | 1                 |
| 95132   | F23y500   | Worster-Drought syndrome                                  | 1                 |
| 22174   | F390z00   | Congenital hereditary muscular dystrophy NOS              | 1                 |
| 64690   | F390.00   | Congenital hereditary muscular dystrophy                  | 1                 |
| 68118   | F391.00   | Hereditary progressive muscular dystrophy                 | 1                 |
| 71128   | F391y00   | Other specified hereditary progressive muscular dystrophy | 1                 |
| 21425   | F391z00   | Hereditary progressive muscular dystrophy NOS             | 1                 |
| 41904   | F391600   | Ocular muscular dystrophy                                 | 1                 |
| 48036   | F391100   | Erb's muscular dystrophy                                  | 1                 |
| 5393    | F391000   | Duchenne muscular dystrophy                               | 1                 |
| 36671   | F391400   | Facioscapulohumeral muscular dystrophy                    | 1                 |
| 34985   | F391A00   | Emery-Dreifuss muscular dystrophy                         | 1                 |
| 5964    | F39B.00   | Muscular dystrophy                                        | 1                 |
| 91544   | F391200   | Pelvic muscular dystrophy                                 | 1                 |
| 28210   | F391300   | Other limb-girdle muscular dystrophy                      | 1                 |
| 95892   | P226000   | Congenital bilateral perisylvian syndrome                 | 1                 |
| 31853   | PKyz600   | Congenital hemihypertrophy                                | 1                 |
| 46937   | F365.00   | Neuropathy in association with hereditary ataxia          | 1                 |
| 97916   | Q007111   | Fetal alcohol syndrome                                    | 1                 |
| 23945   | PK80.00   | Fetal alcohol syndrome                                    | 1                 |
| 4479    | PK5..00   | Tuberous sclerosis                                        | 1                 |
| 12067   | B927.11   | Von Recklinghausen's disease                              | 1                 |
| 16854   | B927.00   | Neurofibromatosis - Von Recklinghausen's disease          | 1                 |
| 23455   | BBe1.12   | [M]Von Recklinghausen's disease                           | 1                 |
| 100900  | B927.12   | Neurofibromatosis type 1                                  | 1                 |
| 101052  | B929.00   | Neurofibromatosis type 2                                  | 1                 |
| 4119    | 7G03H00   | Excision of neurofibromata                                | 1                 |
| 36785   | BBe1.11   | [M]Multiple neurofibromatosis                             | 1                 |
| 765     | BBe1.00   | [M]Neurofibromatosis NOS                                  | 1                 |
| 59749   | BBe3.00   | [M]Melanotic neurofibroma                                 | 1                 |
| 12016   | BBe4.00   | [M]Plexiform neurofibroma                                 | 1                 |
| 26309   | BBe0.00   | [M]Neurofibroma NOS                                       | 1                 |
| 67445   | N374C00   | Scoliosis in neurofibromatosis                            | 1                 |

|        |         |                                                              |   |
|--------|---------|--------------------------------------------------------------|---|
| 3023   | BBe..11 | [M]Neurofibromas                                             | 1 |
| 106103 | F368200 | Hereditary motor and sensory neuropathy type III             | 1 |
| 32527  | F368.00 | Hereditary motor and sensory neuropathy                      | 1 |
| 39528  | F360.00 | Hereditary peripheral neuropathy                             | 1 |
| 7635   | F362.00 | Hereditary sensory neuropathy                                | 1 |
| 38401  | F360z00 | Hereditary peripheral neuropathy NOS                         | 1 |
| 35465  | F368100 | Hereditary motor and sensory neuropathy type II              | 1 |
| 56910  | F368000 | Hereditary motor and sensory neuropathy type I               | 1 |
| 93159  | C03y100 | Congenital hypothyroidism without goitre                     | 1 |
| 51481  | C03z.00 | Congenital hypothyroidism NOS                                | 1 |
| 10097  | C03..00 | Congenital hypothyroidism                                    | 1 |
| 69290  | C03y.00 | Other specified congenital hypothyroidism                    | 1 |
| 31612  | C03y000 | Congenital hypothyroidism with diffuse goitre                | 1 |
| 58833  | Q433700 | Neonatal jaundice with congenital hypothyroidism             | 1 |
| 108482 | IJM0.00 | Suspected congenital hypothyroidism                          | 1 |
| 39166  | C0A1.00 | Congenital iodine-deficiency syndrome, myxoedematous type    | 1 |
| 96787  | C0A..00 | Congenital iodine deficiency syndrome                        | 1 |
| 72331  | C0A0.00 | Congenital iodine-deficiency syndrome, neurological type     | 1 |
| 73317  | L252.00 | Fetus with hereditary disease                                | 1 |
| 56006  | F1z..00 | Hereditary and degenerative diseases of the CNS NOS          | 1 |
| 100666 | L252z00 | Fetus with hereditary disease NOS                            | 1 |
| 61968  | F1y..00 | Hereditary and degenerative diseases of the CNS OS           | 1 |
| 34092  | F1...00 | Hereditary and degenerative diseases of the CNS              | 1 |
| 61640  | L252000 | Fetus with hereditary disease unspecified                    | 1 |
| 107618 | IJY..00 | Suspected hereditary disease                                 | 1 |
| 73575  | PKy6z00 | Congenital malformation syndrome with short stature NOS      | 1 |
| 57953  | PKy6.00 | Congenital malformation syndromes with short stature         | 1 |
| 67260  | PKy5z00 | Congenital malform syndrome affecting facial appearance NOS  | 1 |
| 100310 | PKy8z00 | Congenital malformation syndrome+other skeletal changes NOS  | 1 |
| 94910  | PKy9.00 | Congenital malformation syndromes with metabolic disturbance | 1 |
| 49363  | Q200100 | Subdural haemorrhage unspecified, due to birth trauma        | 2 |
| 23447  | Q200000 | Cerebral haemorrhage unspecified, due to birth trauma        | 2 |
| 61682  | Q208.00 | Cerebral oedema due to birth injury                          | 2 |
| 110910 | Qyu2100 | [X]Other specified brain damage due to birth injury          | 2 |
| 54567  | Q203400 | Fracture of skull due to birth trauma                        | 2 |
| 8021   | Q21z.13 | Birth asphyxia                                               | 2 |
| 63360  | Q412000 | Subarachnoid haemorrhage due to birth injury                 | 2 |
| 98603  | Q20X.00 | Birth injury to central nervous system, unspecified          | 2 |
| 4543   | Q21z.00 | Liveborn with birth asphyxia NOS                             | 2 |
| 46424  | Q216.00 | Mild to moderate birth asphyxia - apgar score 4-7 at 1 min   | 2 |
| 38164  | Q200411 | Cerebral injury due to birth trauma                          | 2 |
| 67184  | Q200z00 | Subdural or cerebral haemorrhage due to birth trauma NOS     | 2 |
| 43595  | Q2...00 | Birth trauma, asphyxia and hypoxia                           | 2 |
| 34694  | Q200.00 | Subdural and cerebral haemorrhage due to birth trauma        | 2 |
| 48731  | Q200700 | Cerebral haemorrhage due to birth injury                     | 2 |
| 41296  | Q21..00 | Intrauterine hypoxia and birth asphyxia                      | 2 |



|        |         |                                                             |   |
|--------|---------|-------------------------------------------------------------|---|
| 63806  | Q200y00 | Subdural or cerebral haemorrhage due to birth trauma OS     | 2 |
| 70312  | Q200300 | Tentorial tear due to birth trauma                          | 2 |
| 38330  | Q200400 | Brain injury due to birth trauma NOS                        | 2 |
| 40868  | Q200z11 | Birth brain damage NOS                                      | 2 |
| 8070   | 14I2.00 | H/O: birth asphyxia                                         | 2 |
| 15082  | Q215.00 | Severe birth asphyxia - apgar score less than 4 at 1 minute | 2 |
| 46446  | Q200200 | Local subdural haematoma due to birth trauma                | 2 |
| 57771  | Q411300 | Intraventricular haemorrhage due to birth injury            | 2 |
| 45002  | Q412.00 | Perinatal subarachnoid haemorrhage                          | 2 |
| 95119  | 14I5.00 | H/O: perinatal cerebral irrit.                              | 2 |
| 104764 | L236200 | Hydrocephalic disproportion with antenatal problem          | 2 |
| 48202  | Q48A.00 | Neonatal cerebral leukomalacia                              | 2 |
| 56614  | Q488.00 | Neonatal cerebral ischaemia                                 | 2 |
| 106012 | Q48F.11 | Perinatal hypoxic - ischaemic encephalopathy                | 2 |
| 24792  | Q31y611 | Neonatal apnoeic attack                                     | 2 |
| 25415  | Q411.00 | Perinatal intraventricular haemorrhage                      | 2 |
| 48012  | Q437.00 | Kernicterus not due to isoimmunisation                      | 2 |
| 61800  | Q437z00 | Kernicterus of newborn NOS                                  | 2 |
| 31452  | Q424.00 | Kernicterus due to isoimmunisation                          | 2 |
| 61533  | L270200 | Polyhydramnios with antenatal problem                       | 2 |
| 52950  | Q013.00 | Fetus or neonate affected by maternal polyhydramnios        | 2 |
| 60841  | Q013.11 | Fetus affected by hydramnios                                | 2 |
| 2239   | L270100 | Polyhydramnios - delivered                                  | 2 |
| 56834  | L27..00 | Polyhydramnios and hydramnios                               | 2 |
| 64728  | L270z00 | Polyhydramnios NOS                                          | 2 |
| 73111  | L270000 | Polyhydramnios unspecified                                  | 2 |
| 15485  | L27..11 | Hydramnios                                                  | 2 |
| 11294  | L270.00 | Polyhydramnios                                              | 2 |
| 73646  | L27z.00 | Polyhydramnios NOS                                          | 2 |
| 21133  | F4K5100 | Congenital nystagmus                                        | 3 |
| 8722   | Q48y200 | Congenital hypotonia                                        | 3 |
| 10665  | F591400 | Congenital sensorineural deafness                           | 3 |
| 19244  | P356.11 | Optic disc congenital anomalies                             | 3 |
| 107323 | F591A00 | Bilateral congenital sensorineural hearing loss             | 3 |
| 53239  | 6371    | Birth HC = < 3rd centile                                    | 3 |
| 36974  | P2y1.00 | Congenital spinal cord anomaly                              | 3 |
| 28353  | P23z.00 | Congenital hydrocephalus NOS                                | 3 |
| 111641 | P23y.00 | Other specified congenital hydrocephalus                    | 3 |
| 101703 | P11z.14 | Congenital hernia of dura mater                             | 3 |
| 105277 | Pyu0300 | [X]Other specified congenital malformations of brain        | 3 |
| 64134  | P248.00 | Congenital dilated lateral ventricles of brain              | 3 |
| 18808  | PE0..13 | Skull congenital deformities                                | 3 |
| 17914  | PE0..00 | Skull, face and jaw congenital deformities                  | 3 |
| 9611   | P23..00 | Congenital hydrocephalus                                    | 3 |
| 41775  | P228000 | Congenital absence of corpus callosum                       | 3 |

|        |         |                                                              |   |
|--------|---------|--------------------------------------------------------------|---|
| 58981  | PK8..00 | Congenital malformation syndromes due to known exogen causes | 3 |
| 101703 | P11z.14 | Congenital hernia of dura mater                              | 3 |
| 105277 | Pyu0300 | [X]Other specified congenital malformations of brain         | 3 |
| 64134  | P248.00 | Congenital dilated lateral ventricles of brain               | 3 |
| 18808  | PE0..13 | Skull congenital deformities                                 | 3 |
| 17914  | PE0..00 | Skull, face and jaw congenital deformities                   | 3 |
| 9611   | P23..00 | Congenital hydrocephalus                                     | 3 |
| 41775  | P228000 | Congenital absence of corpus callosum                        | 3 |
| 58981  | PK8..00 | Congenital malformation syndromes due to known exogen causes | 3 |
| 30344  | 14HZ.00 | H/O: congenital anomaly NOS                                  | 3 |
| 52137  | Pyu1.00 | [X]Congenital malformations of eye, ear, face and neck       | 3 |
| 54258  | PE0z.00 | Skull, face or jaw congenital deformities NOS                | 3 |
| 68208  | P300200 | Congenital absence of eye                                    | 3 |
| 30123  | PE0..12 | Jaw congenital deformities                                   | 3 |
| 36168  | PE0..11 | Face congenital deformities                                  | 3 |
| 98773  | Pyu8400 | [X]Other congenital deformities of skull, face and jaw       | 3 |
| 100673 | Pyu0100 | [X]Other congenital hydrocephalus                            | 3 |
| 37784  | P4z1.00 | Congenital anomaly of face NOS                               | 3 |
| 64425  | Pyu9B00 | [X]Other specified congenital malformations                  | 3 |
| 45918  | P25y200 | Congenital anomaly of spinal meninges                        | 3 |
| 25316  | P22A000 | Congenital absence of cerebellum                             | 3 |
| 299    | P330.00 | Congenital cataract, unspecified                             | 3 |
| 70700  | P33y.00 | Other specified congenital cataract or lens anomaly          | 3 |
| 90279  | P33yz00 | Other congenital cataract or lens anomaly NOS                | 3 |
| 4148   | P33..00 | Congenital cataract and lens anomalies                       | 3 |
| 99424  | P33y100 | Congenital membranous cataract                               | 3 |
| 45926  | P33z.00 | Congenital cataract or lens anomaly NOS                      | 3 |
| 60425  | P332000 | Cortical cataract - congenital                               | 3 |
| 71623  | P334z00 | Total or subtotal congenital cataract NOS                    | 3 |
| 39081  | P334000 | Total congenital cataract                                    | 3 |
| 63212  | P333.00 | Nuclear cataract - congenital                                | 3 |
| 71733  | P240z00 | Congenital cerebral cyst NOS                                 | 3 |
| 53474  | P20..13 | Congenital cerebral hernia                                   | 3 |
| 95632  | P240.11 | Congenital intracerebral cyst                                | 3 |
| 3663   | ZV13600 | [V]Personal history of congenital malformations              | 3 |
| 65095  | Pyu9.00 | [X]Other congenital malformations                            | 3 |
| 103611 | P227100 | Congenital hypoplasia of cerebrum                            | 3 |
| 65088  | P2...00 | Other nervous system congenital anomalies                    | 3 |
| 62537  | PKzz.00 | Congenital anomaly NOS                                       | 3 |
| 17050  | PG02.00 | Congenital forehead deformity                                | 3 |
| 10396  | P...00  | Congenital anomalies                                         | 3 |
| 28113  | F427J00 | Leber's congenital amaurosis                                 | 3 |
| 8319   | P360.00 | Congenital ptosis                                            | 3 |
| 60195  | P245.00 | Congenital adhesions of cerebral meninges                    | 3 |
| 16530  | PK7..00 | Multiple congenital anomalies NOS                            | 3 |

|        |         |                                                     |   |
|--------|---------|-----------------------------------------------------|---|
| 39391  | P240.00 | Congenital cerebral cyst                            | 3 |
| 8893   | P2y0.00 | Congenital brain anomaly                            | 3 |
| 107846 | P240000 | Single congenital cerebral cyst                     | 3 |
| 36463  | PK...00 | Other and unspecified congenital anomalies          | 3 |
| 54569  | PKy0.00 | Multiple system congenital anomalies NEC            | 3 |
| 111629 | PK24100 | Congenital absence of pituitary gland               | 3 |
| 59734  | Py...00 | Other specified congenital anomaly                  | 3 |
| 98724  | PK7z.00 | Multiple congenital anomalies NOS                   | 3 |
| 109441 | P240100 | Multiple congenital cerebral cysts                  | 3 |
| 3374   | PK25100 | Congenital absence of thyroid gland                 | 3 |
| 20838  | 14H..00 | H/O: congenital anomaly                             | 3 |
| 45706  | F4H1600 | Leber's hereditary optic atrophy                    | 3 |
| 55893  | P7y0000 | Congenital anomaly of cerebral vessel, unspecified  | 3 |
| 24424  | P7y0100 | Congenital cerebral arteriovenous aneurysm          | 3 |
| 36666  | P7y0200 | Congenital brain aneurysm NEC                       | 3 |
| 95800  | P7y0111 | Congenital arteriovenous fistula of brain           | 3 |
| 36116  | P201.00 | Encephalomyelocele                                  | 3 |
| 6866   | P113.00 | Spinal meningocele                                  | 3 |
| 99299  | P114200 | Thoracic meningocele                                | 3 |
| 52130  | P204.00 | Meningoencephalocele                                | 3 |
| 103527 | P202.00 | Hydromeningocele - cranial                          | 3 |
| 61862  | P113300 | Lumbar spinal meningocele                           | 3 |
| 47827  | P114300 | Lumbar meningocele                                  | 3 |
| 5307   | 7043100 | Closure of spinal myelomeningocele                  | 3 |
| 27686  | P203.00 | Meningocele - cerebral                              | 3 |
| 91600  | P113200 | Thoracic spinal meningocele                         | 3 |
| 67351  | P113100 | Cervical spinal meningocele                         | 3 |
| 25282  | P203.11 | Meningocele - cranial                               | 3 |
| 99332  | P114000 | Meningomyelocele of unspecified site                | 3 |
| 57611  | P114z00 | Meningomyelocele NOS                                | 3 |
| 9722   | P114.00 | Meningomyelocele                                    | 3 |
| 50365  | P113z00 | Spinal meningocele NOS                              | 3 |
| 53578  | P111.00 | Spinal hydromeningocele                             | 3 |
| 29633  | 7043200 | Closure of spinal meningocele                       | 3 |
| 53929  | P113000 | Spinal meningocele of unspecified site              | 3 |
| 29739  | 7031000 | Repair of meningoencephalocele                      | 3 |
| 40237  | F292300 | Cyst of the spinal meninges                         | 3 |
| 63513  | P101.11 | Closed spina bifida with Arnold-Chiari malformation | 3 |
| 50565  | P100200 | Thoracic spina bifida with hydrocephalus            | 3 |
| 103284 | P102300 | Lumbar spina bifida with hydrocephalus - open       | 3 |
| 46790  | P10..00 | Spina bifida with hydrocephalus                     | 3 |
| 59218  | P10y000 | Dandy - Walker syndrome with spina bifida           | 3 |
| 72928  | P103400 | Sacral spina bifida with hydrocephalus - closed     | 3 |
| 47288  | P102z00 | Spina bifida with hydrocephalus - open NOS          | 3 |
| 5431   | P11..00 | Spina bifida without mention of hydrocephalus       | 3 |

|        |         |                                                            |   |
|--------|---------|------------------------------------------------------------|---|
| 50672  | 7043y00 | Other specified repair of spina bifida                     | 3 |
| 109243 | P100100 | Cervical spina bifida with hydrocephalus                   | 3 |
| 68221  | P110100 | Cervical spina bifida without mention of hydrocephalus     | 3 |
| 98298  | P100z00 | Spina bifida with hydrocephalus NOS                        | 3 |
| 57243  | P102200 | Thoracic spina bifida with hydrocephalus - open            | 3 |
| 102628 | P104.00 | Spina bifida with hydrocephalus of late onset              | 3 |
| 64717  | P10z.00 | Spina bifida with hydrocephalus NOS                        | 3 |
| 98280  | P11z.00 | Spina bifida without mention of hydrocephalus NOS          | 3 |
| 60623  | P102400 | Sacral spina bifida with hydrocephalus - open              | 3 |
| 105767 | P103300 | Lumbar spina bifida with hydrocephalus - closed            | 3 |
| 9298   | 7043    | Repair of spina bifida                                     | 3 |
| 56362  | P105.00 | Spina bifida with stenosis of aqueduct of Sylvius          | 3 |
| 98811  | P102.00 | Spina bifida with hydrocephalus - open                     | 3 |
| 73085  | P10y.00 | Other specified spina bifida with hydrocephalus            | 3 |
| 106579 | Pyu0400 | [X]Unspecified spina bifida with hydrocephalus             | 3 |
| 21802  | P1z..00 | Spina bifida NOS                                           | 3 |
| 62742  | 7043z00 | Repair of spina bifida NOS                                 | 3 |
| 5306   | P100000 | Spina bifida with hydrocephalus, unspecified               | 3 |
| 3947   | P1...00 | Spina bifida                                               | 3 |
| 42497  | P100.00 | Unspecified spina bifida with hydrocephalus                | 3 |
| 96709  | P110200 | Thoracic spina bifida without mention of hydrocephalus     | 3 |
| 57113  | P100300 | Lumbar spina bifida with hydrocephalus                     | 3 |
| 93902  | P103.00 | Spina bifida with hydrocephalus - closed                   | 3 |
| 90482  | P103z11 | Thoracolumbar spina bifida with hydrocephalus - closed     | 3 |
| 96407  | P110300 | Lumbar spina bifida without mention of hydrocephalus       | 3 |
| 53471  | P102.14 | Rachischisis with hydrocephalus                            | 3 |
| 45734  | F117.00 | Infantile posthaemorrhagic hydrocephalus                   | 3 |
| 97663  | P233.12 | Hydrocephalus with atresia of foramina of Magendie+Luschka | 3 |
| 3584   | F115.00 | Hydrocephalus                                              | 3 |
| 52683  | P102.13 | Myelocele with hydrocephalus                               | 3 |
| 104943 | P102.11 | Fissured spine with hydrocephalus                          | 3 |
| 107207 | P235.00 | X-linked hydrocephalus                                     | 3 |
| 66516  | P115300 | Lumbar myelocele                                           | 3 |
| 31775  | P115.00 | Myelocele                                                  | 3 |
| 43593  | P11y.11 | Syringomyelocele                                           | 3 |
| 94598  | P115100 | Cervical myelocele                                         | 3 |
| 73712  | P115z00 | Myelocele NOS                                              | 3 |
| 67878  | P112.00 | Hydromyelocele                                             | 3 |
| 10256  | 222L.00 | O/E - dysmorphic features                                  | 3 |
| 7462   | PG0z.11 | Dysmorphic features                                        | 3 |
| 30403  | 7A61000 | Excision of congenital arteriovenous malformation          | 3 |
| 70280  | Q402100 | Congenital listeriosis                                     | 4 |
| 112021 | Ayu4100 | [X]Other late congenital syphilis, symptomatic             | 4 |
| 112020 | Ayu4000 | [X]Early congenital syphilis, unspecified                  | 4 |
| 19584  | Q401.00 | Congenital cytomegalovirus infection                       | 4 |
| 111987 | A904100 | Congenital syphilitic encephalitis                         | 4 |

|        |         |                                                 |   |
|--------|---------|-------------------------------------------------|---|
| 96395  | A902.00 | Early congenital syphilis NOS                   | 4 |
| 50581  | A900.12 | Congenital syphilitic choroiditis               | 4 |
| 111989 | A905z00 | Other late congenital syphilis NOS              | 4 |
| 46401  | A905000 | Congenital syphilitic gumma                     | 4 |
| 55651  | A900.00 | Early congenital syphilis with symptoms         | 4 |
| 99123  | Q40y012 | Congenital septicaemia                          | 4 |
| 55606  | Q40y011 | Congenital sepsis NOS                           | 4 |
| 96206  | A905.00 | Other late congenital syphilis                  | 4 |
| 96000  | A907.00 | Unspecified late congenital syphilis            | 4 |
| 27420  | A90..00 | Congenital syphilis                             | 4 |
| 107917 | Q402311 | Congenital hydrocephalus due to toxoplasmosis   | 4 |
| 49922  | Q402312 | Lymphadenopathy due to congenital toxoplasmosis | 4 |
| 25304  | Q402300 | Congenital toxoplasmosis                        | 4 |
| 107176 | Ayu4300 | [X]Congenital syphilis, unspecified             | 4 |
| 48725  | A906.00 | Latent late congenital syphilis                 | 4 |
| 60039  | A90z.00 | Congenital syphilis NOS                         | 4 |
| 92295  | A901.00 | Early latent congenital syphilis                | 4 |
| 57279  | A904200 | Congenital syphilitic meningitis                | 4 |
| 112022 | Ayu4200 | [X]Late congenital syphilis, unspecified        | 4 |
| 69219  | A900.14 | Congenital syphilitic epiphysitis               | 4 |
| 111983 | A900.15 | Congenital syphilitic hepatomegaly              | 4 |
| 22157  | A900.16 | Congenital syphilitic osteochondritis           | 4 |
| 111984 | A900.17 | Congenital syphilitic pemphigus                 | 4 |
| 111982 | A900.11 | Congenital syphilitic periostitis               | 4 |
| 16650  | A900.13 | Congenital syphilitic chronic coryza            | 4 |
| 111985 | A900.18 | Congenital syphilitic splenomegaly              | 4 |
| 72315  | F007400 | Meningitis due to congenital syphilis           | 4 |
| 24024  | A905200 | Syphilitic saddle nose                          | 4 |
| 20151  | Q400.00 | Congenital rubella                              | 4 |
| 43003  | Q402000 | Congenital herpes simplex                       | 4 |
| 61089  | A905300 | Late congenital syphilitic oculopathy           | 4 |
| 52505  | A4y0.00 | Enteroviral encephalitis                        | 4 |
| 100599 | Ayu8A00 | [X]Other specified viral encephalitis           | 4 |
| 69405  | F030911 | Herpes zoster encephalitis                      | 4 |
| 52408  | F031.00 | Encephalitis due to rickettsia EC               | 4 |
| 5398   | A4zz.11 | Viral encephalitis NOS                          | 4 |
| 35375  | F033.00 | Encephalitis due to other infection EC          | 4 |
| 57276  | F030500 | Encephalitis due to mumps virus                 | 4 |
| 72309  | F030200 | Encephalitis due to poliomyelitis               | 4 |
| 99925  | F033300 | Encephalitis due to tuberculosis                | 4 |
| 29781  | AE20.00 | Late effects of viral encephalitis              | 4 |
| 64190  | A4zy500 | Adenoviral encephalitis                         | 4 |
| 110877 | AyuJ800 | [X]Sequelae of viral encephalitis               | 4 |
| 47375  | A531400 | Zoster encephalitis                             | 4 |
| 68273  | F030711 | Cytomegaloviral encephalitis                    | 4 |

|        |         |                                                              |   |
|--------|---------|--------------------------------------------------------------|---|
| 42744  | A620.00 | Japanese encephalitis                                        | 4 |
| 46740  | A4zy400 | Von Economo's encephalitis                                   | 4 |
| 51692  | F030900 | Encephalitis due to herpes zoster                            | 4 |
| 20252  | A361.00 | Meningococcal encephalitis                                   | 4 |
| 2423   | F03z.00 | Encephalitis NOS                                             | 4 |
| 89869  | A4zy000 | Acute inclusion body encephalitis                            | 4 |
| 53080  | F03y.00 | Other causes of encephalitis                                 | 4 |
| 111987 | A904100 | Congenital syphilitic encephalitis                           | 4 |
| 29901  | E2A3.00 | Post-encephalitic syndrome                                   | 4 |
| 71467  | A63y000 | Langat encephalitis                                          | 4 |
| 112003 | A94y000 | Syphilitic encephalitis                                      | 4 |
| 103077 | A63yz00 | Other tick-borne viral encephalitis NOS                      | 4 |
| 8115   | F033011 | Meningococcal encephalitis                                   | 4 |
| 4311   | A543.00 | Herpetic meningoencephalitis                                 | 4 |
| 65624  | F035z00 | Postinfectious encephalitis NOS                              | 4 |
| 54934  | F030400 | Encephalitis due to herpes simplex virus                     | 4 |
| 36335  | A520.00 | Postvaricella encephalitis                                   | 4 |
| 40323  | F03X.00 | Bacterial meningoencephalitis+meningomyelitis,NEC            | 4 |
| 95336  | Fyu0500 | [X]Bacterial meningoencephalitis+meningomyelitis,NEC         | 4 |
| 48018  | F035.00 | Postinfectious encephalitis                                  | 4 |
| 97778  | F033311 | Tuberculous encephalitis                                     | 4 |
| 105830 | F032000 | Encephalitis due to malaria                                  | 4 |
| 97267  | F030700 | Encephalitis due to cytomegalovirus                          | 4 |
| 69335  | F030800 | Encephalitis due to influenza-specific virus not identified  | 4 |
| 41245  | F030411 | Herpes simplex encephalitis                                  | 4 |
| 61458  | A4zy100 | Acute necrotising encephalitis                               | 4 |
| 59202  | A136.00 | Tuberculous encephalitis or myelitis                         | 4 |
| 28131  | F032011 | Malarial encephalitis                                        | 4 |
| 45838  | E2A3.11 | Post-encephalitis syndrome                                   | 4 |
| 20054  | A550.00 | Postmeasles encephalitis                                     | 4 |
| 112352 | F030600 | Encephalitis due to rubella virus                            | 4 |
| 99730  | Fyu0A00 | [X]Encephalitis,myelitis+encephalomyelitis/other diseases CE | 4 |
| 51105  | F123.00 | Postencephalitic parkinsonism                                | 4 |
| 67787  | F033000 | Encephalitis due to meningococcus                            | 4 |
| 65548  | F034800 | Post smallpox vaccination encephalitis                       | 4 |
| 35938  | F030211 | Poliomyelitis encephalitis                                   | 4 |
| 66055  | A4zy200 | Epidemic encephalitis                                        | 4 |
| 7567   | 1472    | H/O: encephalitis                                            | 4 |
| 25252  | F03..00 | Encephalitis, myelitis and encephalomyelitis                 | 4 |
| 51962  | AD00.00 | Toxoplasma meningoencephalitis                               | 4 |
| 51384  | F035011 | Encephalitis due to varicella                                | 4 |
| 31972  | F030611 | Rubella encephalitis                                         | 4 |
| 47634  | F033411 | Toxoplasmosis encephalitis                                   | 4 |
| 101625 | Ayu8800 | [X]Tick-borne viral encephalitis, unspecified                | 4 |
| 73146  | Ayu8B00 | [X]Unspecified viral encephalitis                            | 4 |

|        |         |                                                             |   |
|--------|---------|-------------------------------------------------------------|---|
| 32181  | A4zy300 | Encephalitis lethargica                                     | 4 |
| 93360  | A136000 | Tuberculous encephalitis                                    | 4 |
| 35344  | F033z00 | Unspecified encephalitis due to other infection EC          | 4 |
| 42240  | F030z00 | Encephalitis in viral disease NOS                           | 4 |
| 61712  | A62..00 | Mosquito-borne viral encephalitis                           | 4 |
| 105627 | Fyu0600 | [X]Other encephalitis, myelitis and encephalomyelitis       | 4 |
| 62098  | A62y.11 | Ilheus virus encephalitis                                   | 4 |
| 72549  | F033111 | Syphilis encephalitis                                       | 4 |
| 42730  | F035000 | Encephalitis following chickenpox                           | 4 |
| 102964 | A62y.00 | Other specified mosquito-borne virus encephalitis           | 4 |
| 58574  | F030.00 | Encephalitis in viral disease EC                            | 4 |
| 66247  | F033400 | Encephalitis due to toxoplasmosis                           | 4 |
| 104680 | Fyu0800 | [X]Encephalitis,myelitis+encephalomyelitis/viral disease CE | 4 |
| 62737  | A63..00 | Tick-borne viral encephalitis                               | 4 |
| 4075   | F030511 | Mumps encephalitis                                          | 4 |
| 73435  | F033100 | Encephalitis due to congenital syphilis                     | 4 |
| 43791  | A130300 | Tuberculous meningoencephalitis                             | 4 |
| 97992  | F032100 | Encephalitis due to trypanosomiasis                         | 4 |
| 112427 | F030300 | Encephalitis due to arthropod-borne virus                   | 4 |
| 52677  | A412.00 | Subacute sclerosing panencephalitis                         | 4 |
| 32004  | A722.00 | Mumps encephalitis                                          | 4 |
| 37427  | F035100 | Encephalitis following measles                              | 4 |
| 39263  | A64..00 | Viral encephalitis from other arthropods                    | 4 |
| 112040 | F033200 | Encephalitis due to syphilis unspecified                    | 4 |
| 50084  | Eu06100 | [X]Postencephalitic syndrome                                | 4 |
| 71658  | F030A00 | Encephalitis due to influenza-virus identified              | 4 |
| 72072  | A136z00 | Tuberculous encephalitis or myelitis NOS                    | 4 |
| 23807  | A560100 | Rubella encephalomyelitis                                   | 4 |
| 61707  | F03y.11 | Encephalomyelitis NOS                                       | 4 |
| 95623  | F03z.11 | Encephalomyelitis NOS                                       | 4 |
| 5061   | F03..11 | Encephalomyelitis                                           | 4 |
| 21936  | A365.00 | Meningococcal meningitis with acute meningococcal septicaem | 4 |
| 69322  | A130z00 | Tuberculous meningitis NOS                                  | 4 |
| 63007  | F00z.00 | Bacterial meningitis NOS                                    | 4 |
| 56366  | F007800 | Meningitis due to pertussis                                 | 4 |
| 59496  | A918000 | Acute secondary syphilitic meningitis                       | 4 |
| 24577  | A366.00 | Meningococcal meningitis with meningococcal septicaemia     | 4 |
| 43411  | F011700 | Varicella meningitis                                        | 4 |
| 6902   | F011.00 | Meningitis due to viral organisms EC                        | 4 |
| 50934  | A421.00 | ECHO viral meningitis                                       | 4 |
| 34410  | A420.00 | Coxsackie viral meningitis                                  | 4 |
| 68629  | A362100 | Chronic meningococcaemia                                    | 4 |
| 6838   | F00..00 | Bacterial meningitis                                        | 4 |
| 97624  | F007200 | Meningitis due to neurosyphilis                             | 4 |
| 57895  | F011211 | Herpes zoster meningitis                                    | 4 |
| 107659 | F007700 | Meningitis due to actinomycosis                             | 4 |

|        |         |                                                      |   |
|--------|---------|------------------------------------------------------|---|
| 34412  | F01z.00 | Meningitis due to organism NOS                       | 4 |
| 52697  | F00y611 | Pseudomonas meningitis                               | 4 |
| 69547  | AB65200 | Cryptococcal meningitis                              | 4 |
| 11975  | A130.00 | Tuberculous meningitis                               | 4 |
| 60737  | A942.00 | Syphilitic meningitis                                | 4 |
| 5544   | A553.00 | Measles complicated by meningitis                    | 4 |
| 72924  | Ayu3D00 | [X]Meningococcal infection, unspecified              | 4 |
| 68978  | F00y411 | Klebsiella meningitis                                | 4 |
| 37292  | Ayu8D00 | [X]Viral meningitis, unspecified                     | 4 |
| 73327  | A36y.00 | Other specified meningococcal infection              | 4 |
| 28287  | F011411 | Mumps meningitis                                     | 4 |
| 1705   | A36..00 | Meningococcal infection                              | 4 |
| 40589  | F011000 | Meningitis due to coxsackie virus                    | 4 |
| 57281  | A022100 | Salmonella meningitis                                | 4 |
| 7038   | 1471    | H/O: meningitis                                      | 4 |
| 8115   | F033011 | Meningococcal encephalitis                           | 4 |
| 112016 | A98y100 | Gonococcal meningitis                                | 4 |
| 99930  | Ayu3B00 | [X]Meningococcaemia, unspecified                     | 4 |
| 50648  | A36yz00 | Other specified meningococcal infection NOS          | 4 |
| 40088  | F01y000 | Meningitis due to leptospira                         | 4 |
| 65853  | A42y.00 | Other specified viral meningitis                     | 4 |
| 45009  | A54x100 | Herpes simplex meningitis                            | 4 |
| 48106  | F020.00 | Nonpyogenic meningitis                               | 4 |
| 54151  | AA0y000 | Leptospiral meningitis                               | 4 |
| 97348  | F00y.00 | Other specified bacterial meningitis                 | 4 |
| 69606  | AB32.00 | Coccidioidal meningitis                              | 4 |
| 44889  | F011100 | Meningitis due to ECHO virus                         | 4 |
| 70181  | F00y511 | Proteus morganii meningitis                          | 4 |
| 54290  | F011400 | Meningitis due to mumps virus                        | 4 |
| 112346 | Ayu3C00 | [X]Other meningococcal infections                    | 4 |
| 52479  | F00y200 | Meningitis due to escherichia coli                   | 4 |
| 39757  | A36z.00 | Meningococcal infection NOS                          | 4 |
| 112039 | F007000 | Meningitis due to gonococcus                         | 4 |
| 17208  | A36y000 | Meningococcal optic neuritis                         | 4 |
| 442    | A360.00 | Meningococcal meningitis                             | 4 |
| 94724  | F011611 | Adenovirus meningitis                                | 4 |
| 50054  | Ayu8C00 | [X]Other viral meningitis                            | 4 |
| 60157  | AB40100 | Histoplasma capsulatum with meningitis               | 4 |
| 71464  | F011200 | Meningitis due to herpes zoster virus                | 4 |
| 29874  | A721.00 | Mumps meningitis                                     | 4 |
| 2422   | F011500 | Meningitis due to lymphocytic choriomeningitis virus | 4 |
| 70408  | F00y500 | Meningitis due to proteus morganii                   | 4 |
| 31983  | F010000 | Meningitis due to cryptococcus                       | 4 |
| 46388  | F00y212 | Escherichia coli meningitis                          | 4 |
| 42699  | F00y211 | Meningitis due to escherichia coli                   | 4 |



|        |         |                                                            |   |
|--------|---------|------------------------------------------------------------|---|
| 11736  | F005.00 | Meningitis - meningococcal                                 | 4 |
| 107144 | P114100 | Cervical meningomyelocele                                  | 4 |
| 3945   | F02..00 | Meningitis of unspecified cause                            | 4 |
| 72095  | F00yz00 | Other specified bacterial meningitis NOS                   | 4 |
| 2386   | F02z.00 | Unspecified meningitis                                     | 4 |
| 99700  | F007.00 | Meningitis in other bacterial disease classified elsewhere | 4 |
| 4605   | F001.00 | Pneumococcal meningitis                                    | 4 |
| 50303  | F003.00 | Staphylococcal meningitis                                  | 4 |
| 54321  | F011300 | Meningitis due to herpes simplex virus                     | 4 |
| 63388  | AB2y200 | Candidal meningitis                                        | 4 |
| 41208  | A13..00 | Tuberculosis of meninges and central nervous system        | 4 |
| 66554  | F007z00 | Unspecified meningitis in bacterial disease EC             | 4 |
| 68274  | A4z1.00 | Adenoviral meningitis                                      | 4 |
| 72733  | F011600 | Meningitis due to adenovirus                               | 4 |
| 12551  | A42..00 | Meningitis due to enterovirus                              | 4 |
| 72193  | F00y400 | Meningitis due to klebsiella pneumoniae                    | 4 |
| 1703   | A362.00 | Meningococcal septicaemia                                  | 4 |
| 45839  | F011511 | Lymphocytic choriomeningitis                               | 4 |
| 67432  | F011z11 | Acute aseptic meningitis                                   | 4 |
| 105982 | Fyu0000 | [X]Other bacterial meningitis                              | 4 |
| 50873  | F007100 | Meningitis due to listeriosis                              | 4 |
| 72646  | F012.00 | Meningitis due to trypanosomiasis                          | 4 |
| 2169   | A42z.00 | Viral meningitis NOS                                       | 4 |
| 44618  | F01yz00 | Other non-bacterial meningitis NOS                         | 4 |
| 11976  | F004.00 | Meningitis - tuberculous                                   | 4 |
| 61657  | F010.00 | Meningitis due to fungal organisms                         | 4 |
| 41811  | F011y00 | Other viral meningitis                                     | 4 |
| 27627  | F01..00 | Meningitis due to other organisms                          | 4 |
| 90288  | F00y600 | Meningitis due to pseudomonas                              | 4 |
| 45182  | F011311 | Herpes simplex meningitis                                  | 4 |
| 49633  | F022.00 | Chronic meningitis                                         | 4 |
| 33601  | A4z0.00 | Lymphocytic choriomeningitis                               | 4 |
| 2845   | F000.00 | Haemophilus meningitis                                     | 4 |
| 4396   | F002.00 | Streptococcal meningitis                                   | 4 |
| 100075 | Fyu0100 | [X]Meningitis in viral diseases classified elsewhere       | 4 |
| 61924  | Fyu0400 | [X]Meningitis due to other specified causes                | 4 |
| 72444  | F007600 | Meningitis due to typhoid fever                            | 4 |
| 11929  | F011z00 | Meningitis - viral NOS                                     | 4 |
| 44944  | A530.00 | Herpes zoster with meningitis                              | 4 |
| 66107  | F00y100 | Meningitis due to bacillus pyocyaneus                      | 4 |
| 50677  | A362000 | Acute meningococcaemia                                     | 4 |
| 72216  | F007300 | Meningitis due to salmonella                               | 4 |
| 66314  | F137111 | Congenital athetosis                                       | 5 |
| 53178  | F23y.00 | Other congenital cerebral palsy                            | 5 |
| 90520  | Fyu9000 | [X]Other infantile cerebral palsy                          | 5 |

|        |         |                                                              |   |
|--------|---------|--------------------------------------------------------------|---|
| 105133 | F2B1.00 | Spastic hemiplegic cerebral palsy                            | 5 |
| 104654 | F2Bz.00 | Cerebral palsy NOS                                           | 5 |
| 107551 | F23y600 | Choreoathetoid cerebral palsy                                | 5 |
| 104775 | F230111 | Spastic diplegic cerebral palsy                              | 5 |
| 73943  | F137.11 | Athetoid cerebral palsy                                      | 5 |
| 21548  | F23y000 | Ataxic infantile cerebral palsy                              | 5 |
| 16977  | F137000 | Athetoid cerebral palsy                                      | 5 |
| 5512   | F230100 | Cerebral palsy with spastic diplegia                         | 5 |
| 104828 | F23y100 | Flaccid infantile cerebral palsy                             | 5 |
| 2069   | F23..00 | Congenital cerebral palsy                                    | 5 |
| 28306  | F23z.00 | Congenital cerebral palsy NOS                                | 5 |
| 25570  | F23y200 | Spastic cerebral palsy                                       | 5 |
| 12666  | F23yz00 | Other infantile cerebral palsy NOS                           | 5 |
| 5560   | F23..12 | Infantile cerebral palsy                                     | 5 |
| 104782 | F2By.00 | Other cerebral palsy                                         | 5 |
| 49967  | F23y300 | Dyskinetic cerebral palsy                                    | 5 |
| 104580 | F2B0.00 | Spastic quadriplegic cerebral palsy                          | 5 |
| 104498 | F2B..00 | Cerebral palsy                                               | 5 |
| 52659  | F23y400 | Ataxic diplegic cerebral palsy                               | 5 |
| 53755  | Fyu9.00 | [X]Cerebral palsy and other paralytic syndromes              | 5 |
| 26681  | Q48y300 | Congenital hypertonia                                        | 5 |
| 81446  | P2x7.00 | Congenital facial nerve palsy                                | 5 |
| 48126  | F232.11 | Tetraplegia - congenital                                     | 5 |
| 21249  | F232.00 | Congenital quadriplegia                                      | 5 |
| 25324  | F230.00 | Congenital diplegia                                          | 5 |
| 33925  | F233.00 | Congenital monoplegia                                        | 5 |
| 27966  | F231.00 | Congenital hemiplegia                                        | 5 |
| 15530  | F23..11 | Congenital spastic cerebral palsy                            | 5 |
| 37160  | F230000 | Congenital paraplegia                                        | 5 |
| 99040  | F230.11 | Paraplegia - congenital                                      | 5 |
| 50096  | F145.00 | Congenital nonprogressive ataxia                             | 5 |
| 42406  | F137.12 | Athetosis - congenital                                       | 5 |
| 45551  | F230z00 | Congenital diplegia NOS                                      | 5 |
| 94150  | Fyu1000 | [X]Other hereditary ataxias                                  | 5 |
| 3514   | F141.00 | Hereditary spastic paraplegia                                | 5 |
| 26285  | Eu9y700 | [X]Attention deficit disorder                                | 6 |
| 6519   | Eu90011 | [X]Attention deficit hyperactivity disorder                  | 6 |
| 28543  | ZS91.00 | Attention deficit disorder                                   | 6 |
| 5565   | E2E0.00 | Child attention deficit disorder                             | 6 |
| 34199  | E2E0000 | Attention deficit without hyperactivity                      | 6 |
| 20467  | E2E0z00 | Child attention deficit disorder NOS                         | 6 |
| 24753  | ZS91.12 | [X]Attention deficit disorder                                | 6 |
| 24808  | ZS91.11 | ADD - Attention deficit disorder                             | 6 |
| 107332 | 9Ngp.00 | On drug ther ADHD (attention deficit hyperactivity disorder) | 6 |
| 9715   | E2E0100 | Attention deficit with hyperactivity                         | 6 |

|        |         |                                                               |   |
|--------|---------|---------------------------------------------------------------|---|
| 108002 | 8BPT.00 | Drug therapy ADHD (attention deficit hyperactivity disorder)  | 6 |
| 110264 | 8BPT000 | Stimulant drug therapy for ADHD                               | 6 |
| 109779 | 8BPT100 | Non-stimulant drug therapy for ADHD                           | 6 |
| 111733 | 9Ngp000 | On stim drug ther ADHD (attention def hyperactivity disorder) | 6 |
| 69016  | E140100 | Residual infantile autism                                     | 6 |
| 24044  | Eu84100 | [X]Atypical autism                                            | 6 |
| 26343  | 1J9..00 | Suspected autism                                              | 6 |
| 42941  | Eu84z11 | [X]Autistic spectrum disorder                                 | 6 |
| 1276   | E140.12 | Autism                                                        | 6 |
| 7302   | E140.13 | Childhood autism                                              | 6 |
| 50337  | Eu84012 | [X]Infantile autism                                           | 6 |
| 9982   | Eu84011 | [X]Autistic disorder                                          | 6 |
| 22098  | E140.00 | Infantile autism                                              | 6 |
| 3637   | Eu84000 | [X]Childhood autism                                           | 6 |
| 51375  | Eu84511 | [X]Autistic psychopathy                                       | 6 |
| 36662  | E140z00 | Infantile autism NOS                                          | 6 |
| 34174  | Eu84112 | [X]Mental retardation with autistic features                  | 6 |
| 63251  | E140000 | Active infantile autism                                       | 6 |
| 59723  | F034000 | Post BCG vaccination encephalitis                             | 7 |
| 39346  | F034J00 | Post hepatitis B vaccination encephalitis                     | 7 |
| 107155 | F034900 | Post rabies vaccination encephalitis                          | 7 |
| 49070  | F034G00 | Post influenza vaccination encephalitis                       | 7 |
| 68395  | F034700 | Post pertussis vaccination encephalitis                       | 7 |
| 97847  | F034A00 | Post typhus vaccination encephalitis                          | 7 |
| 65184  | F034x00 | Post mixed vaccination encephalitis                           | 7 |
| 39398  | F034D00 | Post polio vaccination encephalitis                           | 7 |
| 46467  | F034200 | Post paratyphoid vaccination encephalitis                     | 7 |
| 66883  | F034500 | Post tetanus vaccination encephalitis                         | 7 |
| 96428  | F034z00 | Postimmunisation encephalitis NOS                             | 7 |
| 67795  | F034C00 | Post measles vaccination encephalitis                         | 7 |
| 36707  | F034B00 | Post yellow fever vaccination encephalitis                    | 7 |
| 31544  | F034H00 | Post hepatitis A vaccination encephalitis                     | 7 |
| 103322 | F034F00 | Post rubella vaccination encephalitis                         | 7 |
| 31510  | F034.00 | Postimmunisation encephalitis                                 | 7 |
| 92431  | F034E00 | Post mumps vaccination encephalitis                           | 7 |
| 97865  | F034100 | Post typhoid vaccination encephalitis                         | 7 |
| 27632  | S643.00 | Diffuse brain injury                                          | 7 |
| 10201  | S64..11 | Brain injury NOS                                              | 7 |
| 32214  | S644.00 | Focal brain injury                                            | 7 |
| 107337 | S647.00 | Acquired brain injury                                         | 7 |

**Table 3. Incidence of any fracture in males and females with and without Intellectual Disabilities (ID) by age bands.**

Age bands are single years up until age 17, then 18-24, and subsequently in 5-year bands, until 80 which includes events and time at age  $\geq 80$  years.

Legend

has\_id: 0= No 1= Yes is\_female: 0= No 1= Yes ageband: lower age limit of ageband (years) \_D: number of fractures  
 \_Y: patientyears (10000 py) of follow-up \_Rate: events/10000 py \_Lower: lower limit of 95% CI for fracture rate  
 \_Upper: upper limit of 95% CI for fracture rate

| has_id | is_female | ageband | _D   | _Y     | _Rate   | _Lower  | _Upper  |
|--------|-----------|---------|------|--------|---------|---------|---------|
| 0      | 0         | 0       | 77   | 0.917  | 83.982  | 67.171  | 105.001 |
| 0      | 0         | 2       | 97   | 1.057  | 91.735  | 75.181  | 111.934 |
| 0      | 0         | 3       | 125  | 1.147  | 108.994 | 91.468  | 129.878 |
| 0      | 0         | 4       | 154  | 1.239  | 124.271 | 106.116 | 145.533 |
| 0      | 0         | 5       | 170  | 1.341  | 126.786 | 109.091 | 147.352 |
| 0      | 0         | 6       | 214  | 1.436  | 149.076 | 130.383 | 170.449 |
| 0      | 0         | 7       | 232  | 1.539  | 150.733 | 132.533 | 171.433 |
| 0      | 0         | 8       | 277  | 1.638  | 169.106 | 150.320 | 190.241 |
| 0      | 0         | 9       | 297  | 1.729  | 171.778 | 153.312 | 192.468 |
| 0      | 0         | 10      | 426  | 1.811  | 235.202 | 213.895 | 258.632 |
| 0      | 0         | 11      | 465  | 1.885  | 246.620 | 225.193 | 270.086 |
| 0      | 0         | 12      | 635  | 1.964  | 323.329 | 299.134 | 349.481 |
| 0      | 0         | 13      | 781  | 2.037  | 383.474 | 357.501 | 411.334 |
| 0      | 0         | 14      | 722  | 2.100  | 343.839 | 319.652 | 369.857 |
| 0      | 0         | 15      | 702  | 2.151  | 326.366 | 303.094 | 351.424 |
| 0      | 0         | 16      | 581  | 2.187  | 265.714 | 244.963 | 288.223 |
| 0      | 0         | 17      | 536  | 2.231  | 240.259 | 220.756 | 261.484 |
| 0      | 0         | 18      | 3037 | 15.028 | 202.096 | 195.035 | 209.413 |
| 0      | 0         | 25      | 1390 | 9.239  | 150.441 | 142.737 | 158.562 |
| 0      | 0         | 30      | 901  | 7.695  | 117.082 | 109.681 | 124.982 |
| 0      | 0         | 35      | 760  | 7.143  | 106.396 | 99.094  | 114.235 |
| 0      | 0         | 40      | 652  | 6.952  | 93.783  | 86.854  | 101.265 |
| 0      | 0         | 45      | 597  | 6.562  | 90.977  | 83.964  | 98.575  |
| 0      | 0         | 50      | 550  | 6.036  | 91.126  | 83.819  | 99.069  |
| 0      | 0         | 55      | 465  | 5.318  | 87.444  | 79.847  | 95.765  |
| 0      | 0         | 60      | 412  | 4.397  | 93.700  | 85.076  | 103.199 |
| 0      | 0         | 65      | 343  | 3.288  | 104.304 | 93.830  | 115.948 |
| 0      | 0         | 70      | 231  | 2.247  | 102.786 | 90.350  | 116.933 |
| 0      | 0         | 75      | 193  | 1.391  | 138.783 | 120.522 | 159.811 |
| 0      | 0         | 80      | 270  | 1.043  | 258.967 | 229.849 | 291.775 |
| 0      | 1         | 0       | 45   | 0.541  | 83.238  | 62.149  | 111.484 |
| 0      | 1         | 2       | 54   | 0.620  | 87.154  | 66.750  | 113.794 |
| 0      | 1         | 3       | 52   | 0.661  | 78.676  | 59.952  | 103.248 |
| 0      | 1         | 4       | 79   | 0.702  | 112.583 | 90.303  | 140.359 |
| 0      | 1         | 5       | 93   | 0.747  | 124.463 | 101.572 | 152.513 |
| 0      | 1         | 6       | 104  | 0.805  | 129.173 | 106.587 | 156.544 |
| 0      | 1         | 7       | 110  | 0.855  | 128.663 | 106.732 | 155.100 |
| 0      | 1         | 8       | 134  | 0.893  | 149.994 | 126.631 | 177.666 |
| 0      | 1         | 9       | 159  | 0.937  | 169.704 | 145.273 | 198.242 |

|   |   |    |     |       |         |         |         |
|---|---|----|-----|-------|---------|---------|---------|
| 0 | 1 | 10 | 198 | 0.975 | 203.083 | 176.678 | 233.435 |
| 0 | 1 | 11 | 175 | 1.005 | 174.166 | 150.182 | 201.980 |
| 0 | 1 | 12 | 164 | 1.047 | 156.620 | 134.393 | 182.521 |
| 0 | 1 | 13 | 143 | 1.078 | 132.653 | 112.600 | 156.279 |
| 0 | 1 | 14 | 104 | 1.100 | 94.542  | 78.011  | 114.576 |
| 0 | 1 | 15 | 73  | 1.118 | 65.290  | 51.906  | 82.124  |
| 0 | 1 | 16 | 86  | 1.135 | 75.791  | 61.352  | 93.628  |
| 0 | 1 | 17 | 83  | 1.155 | 71.892  | 57.976  | 89.148  |
| 0 | 1 | 18 | 524 | 7.358 | 71.215  | 65.371  | 77.581  |
| 0 | 1 | 25 | 261 | 4.677 | 55.806  | 49.430  | 63.004  |
| 0 | 1 | 30 | 306 | 4.338 | 70.541  | 63.064  | 78.905  |
| 0 | 1 | 35 | 327 | 4.523 | 72.299  | 64.872  | 80.575  |
| 0 | 1 | 40 | 351 | 4.967 | 70.672  | 63.652  | 78.466  |
| 0 | 1 | 45 | 423 | 5.199 | 81.367  | 73.971  | 89.503  |
| 0 | 1 | 50 | 548 | 5.077 | 107.928 | 99.260  | 117.354 |
| 0 | 1 | 55 | 630 | 4.562 | 138.092 | 127.719 | 149.307 |
| 0 | 1 | 60 | 613 | 3.792 | 161.672 | 149.367 | 174.991 |
| 0 | 1 | 65 | 597 | 2.969 | 201.081 | 185.581 | 217.876 |
| 0 | 1 | 70 | 458 | 2.135 | 214.494 | 195.722 | 235.065 |
| 0 | 1 | 75 | 430 | 1.476 | 291.266 | 264.997 | 320.139 |
| 0 | 1 | 80 | 747 | 1.505 | 496.480 | 462.123 | 533.391 |
| 1 | 0 | 0  | 22  | 0.187 | 117.946 | 77.662  | 179.127 |
| 1 | 0 | 2  | 27  | 0.239 | 112.911 | 77.433  | 164.646 |
| 1 | 0 | 3  | 25  | 0.274 | 91.154  | 61.594  | 134.902 |
| 1 | 0 | 4  | 44  | 0.313 | 140.546 | 104.591 | 188.860 |
| 1 | 0 | 5  | 54  | 0.348 | 155.178 | 118.849 | 202.611 |
| 1 | 0 | 6  | 64  | 0.378 | 169.383 | 132.578 | 216.407 |
| 1 | 0 | 7  | 71  | 0.407 | 174.377 | 138.188 | 220.044 |
| 1 | 0 | 8  | 78  | 0.429 | 181.866 | 145.670 | 227.055 |
| 1 | 0 | 9  | 83  | 0.450 | 184.537 | 148.817 | 228.831 |
| 1 | 0 | 10 | 73  | 0.463 | 157.702 | 125.375 | 198.364 |
| 1 | 0 | 11 | 113 | 0.473 | 239.142 | 198.876 | 287.562 |
| 1 | 0 | 12 | 133 | 0.481 | 276.782 | 233.523 | 328.055 |
| 1 | 0 | 13 | 133 | 0.485 | 274.226 | 231.366 | 325.025 |
| 1 | 0 | 14 | 132 | 0.484 | 272.480 | 229.745 | 323.163 |
| 1 | 0 | 15 | 103 | 0.482 | 213.562 | 176.057 | 259.057 |
| 1 | 0 | 16 | 96  | 0.476 | 201.879 | 165.278 | 246.585 |
| 1 | 0 | 17 | 66  | 0.473 | 139.442 | 109.551 | 177.488 |
| 1 | 0 | 18 | 474 | 3.026 | 156.622 | 143.138 | 171.376 |
| 1 | 0 | 25 | 269 | 1.794 | 149.914 | 133.028 | 168.943 |
| 1 | 0 | 30 | 194 | 1.595 | 121.623 | 105.658 | 140.000 |
| 1 | 0 | 35 | 202 | 1.573 | 128.441 | 111.896 | 147.433 |
| 1 | 0 | 40 | 194 | 1.548 | 125.310 | 108.861 | 144.244 |
| 1 | 0 | 45 | 230 | 1.390 | 165.438 | 145.381 | 188.262 |
| 1 | 0 | 50 | 161 | 1.139 | 141.299 | 121.075 | 164.901 |
| 1 | 0 | 55 | 144 | 0.875 | 164.619 | 139.812 | 193.826 |
| 1 | 0 | 60 | 118 | 0.676 | 174.429 | 145.633 | 208.920 |

|   |   |    |     |       |         |         |         |
|---|---|----|-----|-------|---------|---------|---------|
| 1 | 0 | 65 | 123 | 0.476 | 258.152 | 216.335 | 308.054 |
| 1 | 0 | 70 | 79  | 0.295 | 267.890 | 214.877 | 333.983 |
| 1 | 0 | 75 | 51  | 0.158 | 322.460 | 245.067 | 424.296 |
| 1 | 0 | 80 | 41  | 0.109 | 377.797 | 278.178 | 513.090 |
| 1 | 1 | 0  | 8   | 0.108 | 74.369  | 37.192  | 148.709 |
| 1 | 1 | 2  | 11  | 0.138 | 79.895  | 44.246  | 144.266 |
| 1 | 1 | 3  | 29  | 0.156 | 185.960 | 129.227 | 267.598 |
| 1 | 1 | 4  | 27  | 0.171 | 157.662 | 108.122 | 229.902 |
| 1 | 1 | 5  | 24  | 0.187 | 128.385 | 86.052  | 191.542 |
| 1 | 1 | 6  | 31  | 0.203 | 152.888 | 107.521 | 217.397 |
| 1 | 1 | 7  | 36  | 0.216 | 166.854 | 120.356 | 231.314 |
| 1 | 1 | 8  | 41  | 0.223 | 183.460 | 135.085 | 249.159 |
| 1 | 1 | 9  | 40  | 0.236 | 169.304 | 124.188 | 230.809 |
| 1 | 1 | 10 | 49  | 0.244 | 201.115 | 152.000 | 266.100 |
| 1 | 1 | 11 | 53  | 0.248 | 213.622 | 163.202 | 279.619 |
| 1 | 1 | 12 | 37  | 0.255 | 145.196 | 105.201 | 200.398 |
| 1 | 1 | 13 | 41  | 0.260 | 157.580 | 116.028 | 214.011 |
| 1 | 1 | 14 | 38  | 0.260 | 145.895 | 106.159 | 200.504 |
| 1 | 1 | 15 | 13  | 0.259 | 50.165  | 29.128  | 86.393  |
| 1 | 1 | 16 | 25  | 0.258 | 96.859  | 65.448  | 143.344 |
| 1 | 1 | 17 | 25  | 0.257 | 97.197  | 65.677  | 143.844 |
| 1 | 1 | 18 | 147 | 1.709 | 86.015  | 73.176  | 101.106 |
| 1 | 1 | 25 | 122 | 1.111 | 109.858 | 91.995  | 131.188 |
| 1 | 1 | 30 | 105 | 1.061 | 98.922  | 81.701  | 119.774 |
| 1 | 1 | 35 | 140 | 1.097 | 127.575 | 108.100 | 150.559 |
| 1 | 1 | 40 | 156 | 1.125 | 138.671 | 118.532 | 162.232 |
| 1 | 1 | 45 | 165 | 1.073 | 153.837 | 132.067 | 179.195 |
| 1 | 1 | 50 | 188 | 0.939 | 200.126 | 173.470 | 230.879 |
| 1 | 1 | 55 | 207 | 0.754 | 274.433 | 239.482 | 314.484 |
| 1 | 1 | 60 | 167 | 0.551 | 302.936 | 260.305 | 352.549 |
| 1 | 1 | 65 | 129 | 0.387 | 332.942 | 280.172 | 395.651 |
| 1 | 1 | 70 | 120 | 0.262 | 457.481 | 382.533 | 547.113 |
| 1 | 1 | 75 | 73  | 0.180 | 404.516 | 321.595 | 508.816 |
| 1 | 1 | 80 | 97  | 0.171 | 565.685 | 463.605 | 690.242 |

**Table 4. Incidence of major osteoporotic fracture in males and females with and without Intellectual Disabilities (ID) by age bands.**

Age bands are single years up until age 17, then 18-24, and subsequently in 5-year bands, until 80 which includes events and time at age  $\geq 80$  years.

Legend

has\_id: 0= No 1= Yes is\_female: 0= No 1= Yes ageband: lower age limit of ageband (years) \_D: number of fractures  
 \_Y: patientyears (10000 py) of follow-up \_Rate: events/10000 py \_Lower: lower limit of 95% CI for fracture rate  
 \_Upper: upper limit of 95% CI for fracture rate

| has_id | is_female | ageband | _D  | _Y     | _Rate   | _Lower  | _Upper  |
|--------|-----------|---------|-----|--------|---------|---------|---------|
| 0      | 0         | 18      | 432 | 24.267 | 17.802  | 16.200  | 19.562  |
| 1      | 0         | 18      | 98  | 4.821  | 20.329  | 16.677  | 24.780  |
| 0      | 0         | 30      | 119 | 7.695  | 15.464  | 12.921  | 18.507  |
| 1      | 0         | 30      | 29  | 1.595  | 18.181  | 12.634  | 26.162  |
| 0      | 0         | 35      | 93  | 7.143  | 13.019  | 10.625  | 15.954  |
| 1      | 0         | 35      | 45  | 1.573  | 28.613  | 21.364  | 38.323  |
| 0      | 0         | 40      | 92  | 6.952  | 13.233  | 10.787  | 16.233  |
| 1      | 0         | 40      | 38  | 1.548  | 24.545  | 17.860  | 33.733  |
| 0      | 0         | 45      | 98  | 6.562  | 14.934  | 12.252  | 18.204  |
| 1      | 0         | 45      | 60  | 1.390  | 43.158  | 33.510  | 55.584  |
| 0      | 0         | 50      | 101 | 6.036  | 16.734  | 13.769  | 20.337  |
| 1      | 0         | 50      | 41  | 1.139  | 35.983  | 26.495  | 48.869  |
| 0      | 0         | 55      | 92  | 5.318  | 17.301  | 14.103  | 21.223  |
| 1      | 0         | 55      | 54  | 0.875  | 61.732  | 47.280  | 80.602  |
| 0      | 0         | 60      | 104 | 4.397  | 23.652  | 19.517  | 28.664  |
| 1      | 0         | 60      | 43  | 0.676  | 63.563  | 47.141  | 85.706  |
| 0      | 0         | 65      | 115 | 3.288  | 34.971  | 29.129  | 41.984  |
| 1      | 0         | 65      | 54  | 0.476  | 113.335 | 86.802  | 147.979 |
| 0      | 0         | 70      | 92  | 2.247  | 40.936  | 33.371  | 50.217  |
| 1      | 0         | 70      | 41  | 0.295  | 139.032 | 102.371 | 188.820 |
| 0      | 0         | 75      | 85  | 1.391  | 61.122  | 49.416  | 75.600  |
| 1      | 0         | 75      | 27  | 0.158  | 170.714 | 117.073 | 248.934 |
| 0      | 0         | 80      | 139 | 1.043  | 133.320 | 112.901 | 157.432 |
| 1      | 0         | 80      | 20  | 0.109  | 184.291 | 118.897 | 285.653 |
| 0      | 1         | 18      | 114 | 12.035 | 9.472   | 7.884   | 11.381  |
| 1      | 1         | 18      | 34  | 2.820  | 12.059  | 8.616   | 16.876  |
| 0      | 1         | 30      | 43  | 4.338  | 9.913   | 7.352   | 13.366  |
| 1      | 1         | 30      | 19  | 1.061  | 17.900  | 11.418  | 28.063  |
| 0      | 1         | 35      | 47  | 4.523  | 10.392  | 7.808   | 13.831  |
| 1      | 1         | 35      | 24  | 1.097  | 21.870  | 14.659  | 32.629  |
| 0      | 1         | 40      | 63  | 4.967  | 12.685  | 9.909   | 16.238  |
| 1      | 1         | 40      | 29  | 1.125  | 25.779  | 17.914  | 37.096  |
| 0      | 1         | 45      | 97  | 5.199  | 18.659  | 15.292  | 22.767  |
| 1      | 1         | 45      | 46  | 1.073  | 42.888  | 32.124  | 57.258  |
| 0      | 1         | 50      | 155 | 5.077  | 30.527  | 26.081  | 35.732  |
| 1      | 1         | 50      | 65  | 0.939  | 69.193  | 54.260  | 88.234  |
| 0      | 1         | 55      | 209 | 4.562  | 45.811  | 40.003  | 52.463  |
| 1      | 1         | 55      | 82  | 0.754  | 108.712 | 87.555  | 134.983 |

|   |   |    |     |       |         |         |         |
|---|---|----|-----|-------|---------|---------|---------|
| 0 | 1 | 60 | 229 | 3.792 | 60.396  | 53.059  | 68.748  |
| 1 | 1 | 60 | 81  | 0.551 | 146.933 | 118.179 | 182.683 |
| 0 | 1 | 65 | 276 | 2.969 | 92.962  | 82.617  | 104.603 |
| 1 | 1 | 65 | 67  | 0.387 | 172.923 | 136.101 | 219.707 |
| 0 | 1 | 70 | 233 | 2.135 | 109.120 | 95.971  | 124.071 |
| 1 | 1 | 70 | 64  | 0.262 | 243.990 | 190.973 | 311.725 |
| 0 | 1 | 75 | 226 | 1.476 | 153.084 | 134.372 | 174.402 |
| 1 | 1 | 75 | 41  | 0.180 | 227.194 | 167.287 | 308.554 |
| 0 | 1 | 80 | 466 | 1.505 | 309.718 | 282.837 | 339.155 |
| 1 | 1 | 80 | 58  | 0.171 | 338.245 | 261.495 | 437.521 |



**Table 5. Incidence of hip fracture in males and females with and without Intellectual Disabilities (ID) by age bands.**

Age bands are single years up until age 17, then 18-24, and subsequently in 5-year bands, until 80 which includes events and time at age  $\geq 80$  years.

Legend

has\_id: 0= No 1= Yes is\_female: 0= No 1= Yes ageband: lower age limit of ageband (years) \_D: number of fractures  
 \_Y: patientyears (10000 py) of follow-up \_Rate: events/10000 py \_Lower: lower limit of 95% CI for fracture rate  
 \_Upper: upper limit of 95% CI for fracture rate

| has_id | is_female | ageband | _D | _Y     | _Rate   | _Lower | _Upper  |
|--------|-----------|---------|----|--------|---------|--------|---------|
| 0      | 0         | 18      | 17 | 24.267 | 0.701   | 0.435  | 1.127   |
| 1      | 0         | 18      | 15 | 4.821  | 3.112   | 1.876  | 5.161   |
| 0      | 0         | 30      | 8  | 7.695  | 1.040   | 0.520  | 2.079   |
| 1      | 0         | 30      | 5  | 1.595  | 3.135   | 1.305  | 7.531   |
| 0      | 0         | 35      | 7  | 7.143  | 0.980   | 0.467  | 2.056   |
| 1      | 0         | 35      | 11 | 1.573  | 6.994   | 3.873  | 12.630  |
| 0      | 0         | 40      | 8  | 6.952  | 1.151   | 0.575  | 2.301   |
| 1      | 0         | 40      | 9  | 1.548  | 5.813   | 3.025  | 11.173  |
| 0      | 0         | 45      | 11 | 6.562  | 1.676   | 0.928  | 3.027   |
| 1      | 0         | 45      | 24 | 1.390  | 17.263  | 11.571 | 25.755  |
| 0      | 0         | 50      | 10 | 6.036  | 1.657   | 0.891  | 3.079   |
| 1      | 0         | 50      | 14 | 1.139  | 12.287  | 7.277  | 20.746  |
| 0      | 0         | 55      | 19 | 5.318  | 3.573   | 2.279  | 5.602   |
| 1      | 0         | 55      | 23 | 0.875  | 26.293  | 17.473 | 39.567  |
| 0      | 0         | 60      | 17 | 4.397  | 3.866   | 2.404  | 6.219   |
| 1      | 0         | 60      | 24 | 0.676  | 35.477  | 23.779 | 52.930  |
| 0      | 0         | 65      | 30 | 3.288  | 9.123   | 6.379  | 13.048  |
| 1      | 0         | 65      | 33 | 0.476  | 69.260  | 49.239 | 97.423  |
| 0      | 0         | 70      | 32 | 2.247  | 14.239  | 10.069 | 20.135  |
| 1      | 0         | 70      | 22 | 0.295  | 74.602  | 49.122 | 113.300 |
| 0      | 0         | 75      | 40 | 1.391  | 28.763  | 21.098 | 39.213  |
| 1      | 0         | 75      | 15 | 0.158  | 94.841  | 57.177 | 157.317 |
| 0      | 0         | 80      | 83 | 1.043  | 79.608  | 64.199 | 98.717  |
| 1      | 0         | 80      | 11 | 0.109  | 101.360 | 56.133 | 183.026 |
| 0      | 1         | 18      | 2  | 12.035 | 0.166   | 0.042  | 0.664   |
| 1      | 1         | 18      | 5  | 2.820  | 1.773   | 0.738  | 4.261   |
| 0      | 1         | 30      | 3  | 4.338  | 0.692   | 0.223  | 2.144   |
| 1      | 1         | 30      | 4  | 1.061  | 3.768   | 1.414  | 10.041  |
| 0      | 1         | 35      | 2  | 4.523  | 0.442   | 0.111  | 1.768   |
| 1      | 1         | 35      | 2  | 1.097  | 1.823   | 0.456  | 7.287   |
| 0      | 1         | 40      | 3  | 4.967  | 0.604   | 0.195  | 1.873   |
| 1      | 1         | 40      | 7  | 1.125  | 6.222   | 2.966  | 13.052  |
| 0      | 1         | 45      | 5  | 5.199  | 0.962   | 0.400  | 2.311   |
| 1      | 1         | 45      | 9  | 1.073  | 8.391   | 4.366  | 16.127  |
| 0      | 1         | 50      | 16 | 5.077  | 3.151   | 1.931  | 5.144   |
| 1      | 1         | 50      | 16 | 0.939  | 17.032  | 10.434 | 27.801  |
| 0      | 1         | 55      | 20 | 4.562  | 4.384   | 2.828  | 6.795   |
| 1      | 1         | 55      | 24 | 0.754  | 31.818  | 21.327 | 47.471  |
| 0      | 1         | 60      | 34 | 3.792  | 8.967   | 6.407  | 12.550  |
| 1      | 1         | 60      | 31 | 0.551  | 56.234  | 39.547 | 79.961  |

|   |   |    |     |       |         |         |         |
|---|---|----|-----|-------|---------|---------|---------|
| 0 | 1 | 65 | 47  | 2.969 | 15.831  | 11.894  | 21.070  |
| 1 | 1 | 65 | 24  | 0.387 | 61.943  | 41.518  | 92.415  |
| 0 | 1 | 70 | 72  | 2.135 | 33.720  | 26.765  | 42.481  |
| 1 | 1 | 70 | 23  | 0.262 | 87.684  | 58.268  | 131.949 |
| 0 | 1 | 75 | 74  | 1.476 | 50.125  | 39.912  | 62.951  |
| 1 | 1 | 75 | 25  | 0.180 | 138.533 | 93.608  | 205.018 |
| 0 | 1 | 80 | 235 | 1.505 | 156.189 | 137.443 | 177.491 |
| 1 | 1 | 80 | 28  | 0.171 | 163.291 | 112.745 | 236.496 |
